# Supplementary material for: Direct observation of Degradation in LiNi0.8Mn0.1Co0.1O2-Li6PS5Cl0.5Br0.5 Composite Electrodes for All Solid-State Batteries
Source: Research Square preprint supplement (doi:10.21203/rs.3.rs-8298137/v1), 2025-12-22
Supplement: Supplementary file 1 [file fcaa7363f7105c06051b3d2b.pdf]

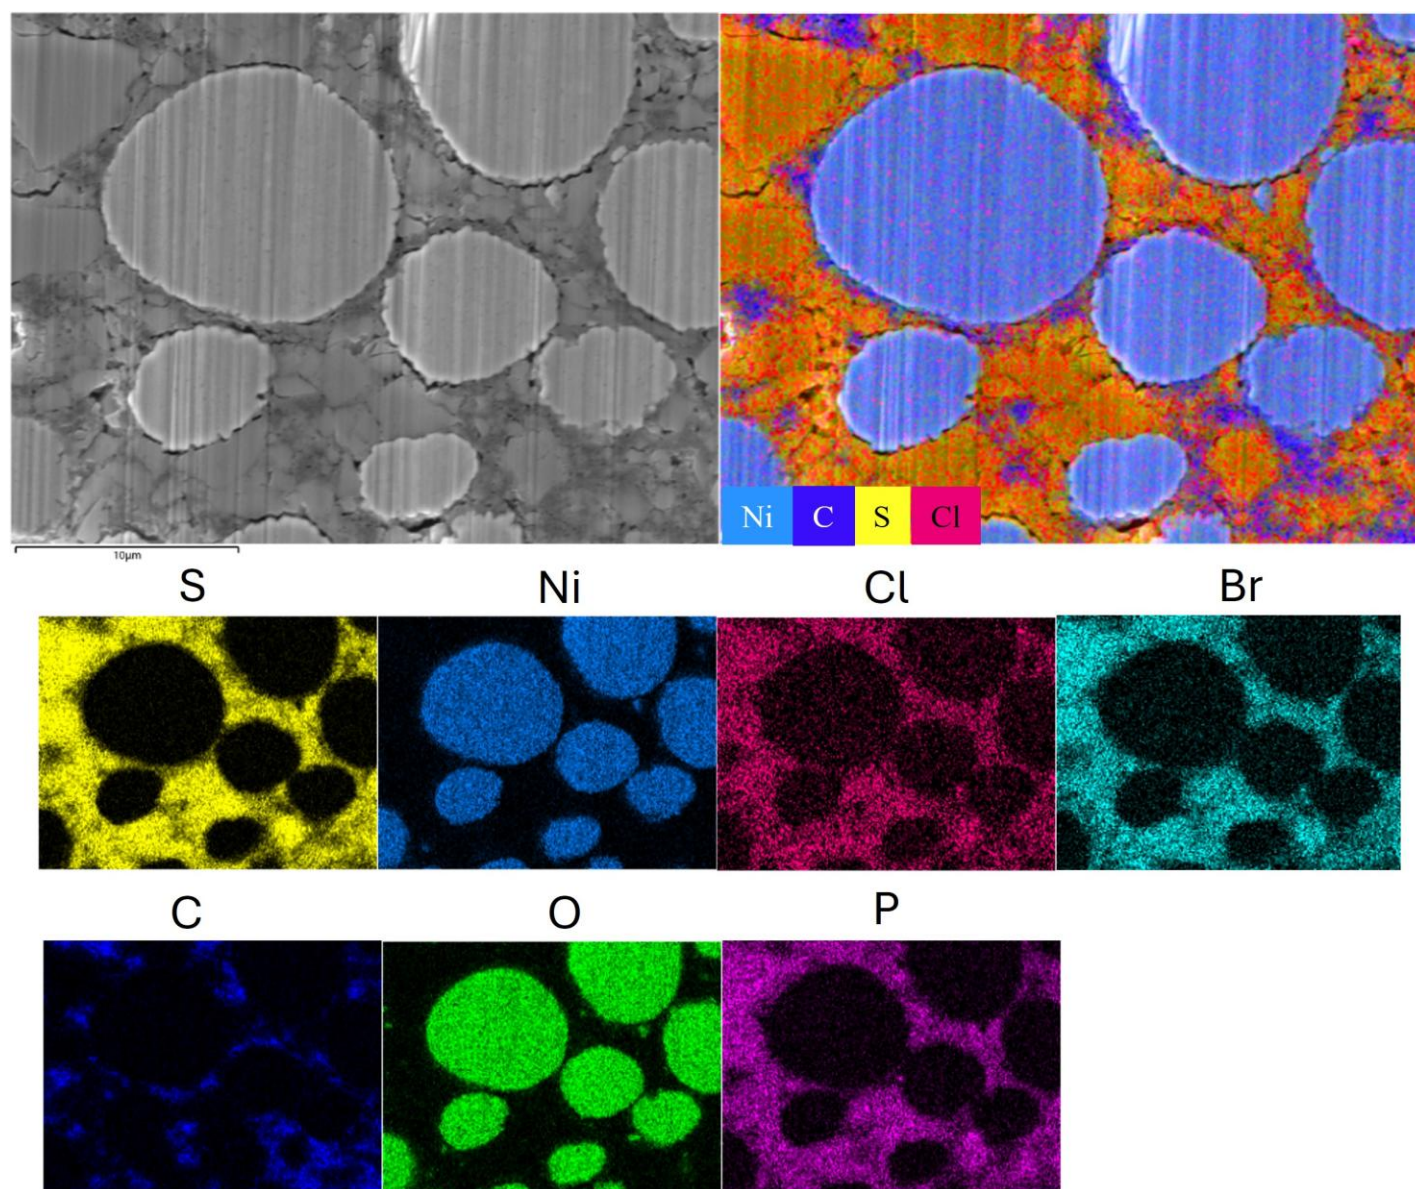

Figure S1. The cross-sectional SEM image and its SEM-EDS mapping of pristine NMC811-LPSClBr

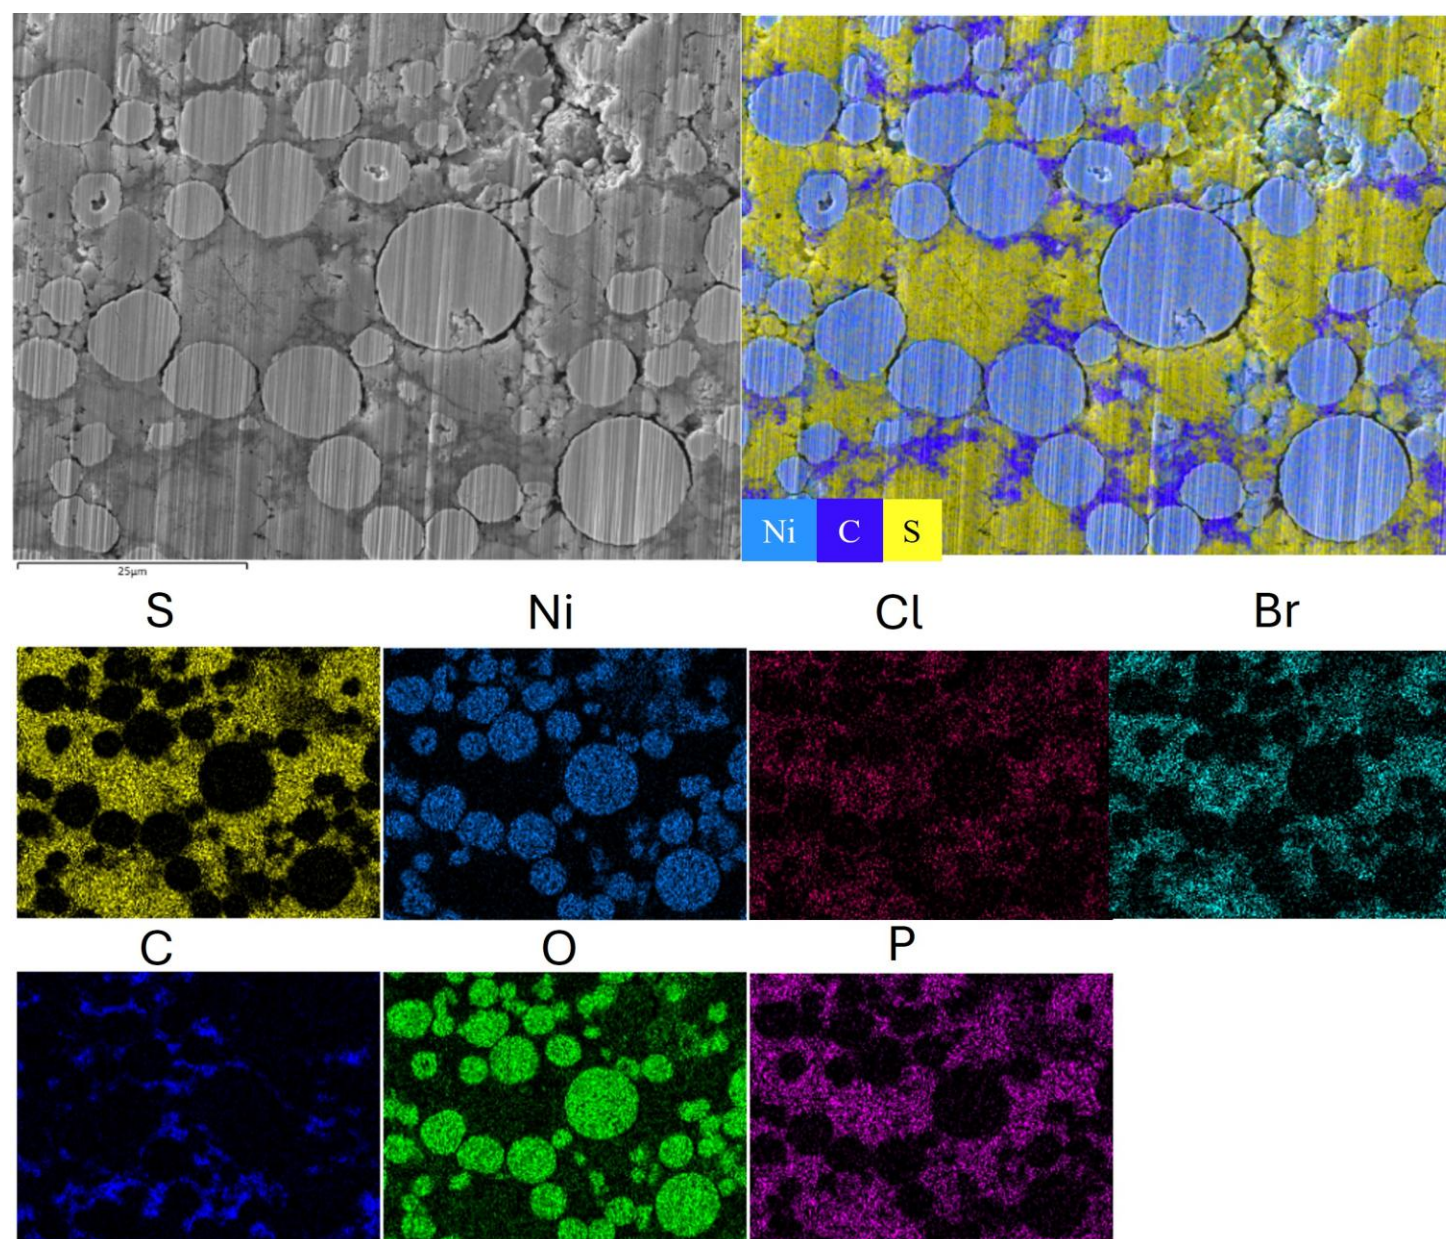

Figure S2. The cross-sectional SEM image and its SEM-EDS mapping results of NMC811-LPSClBr after 50 cycles

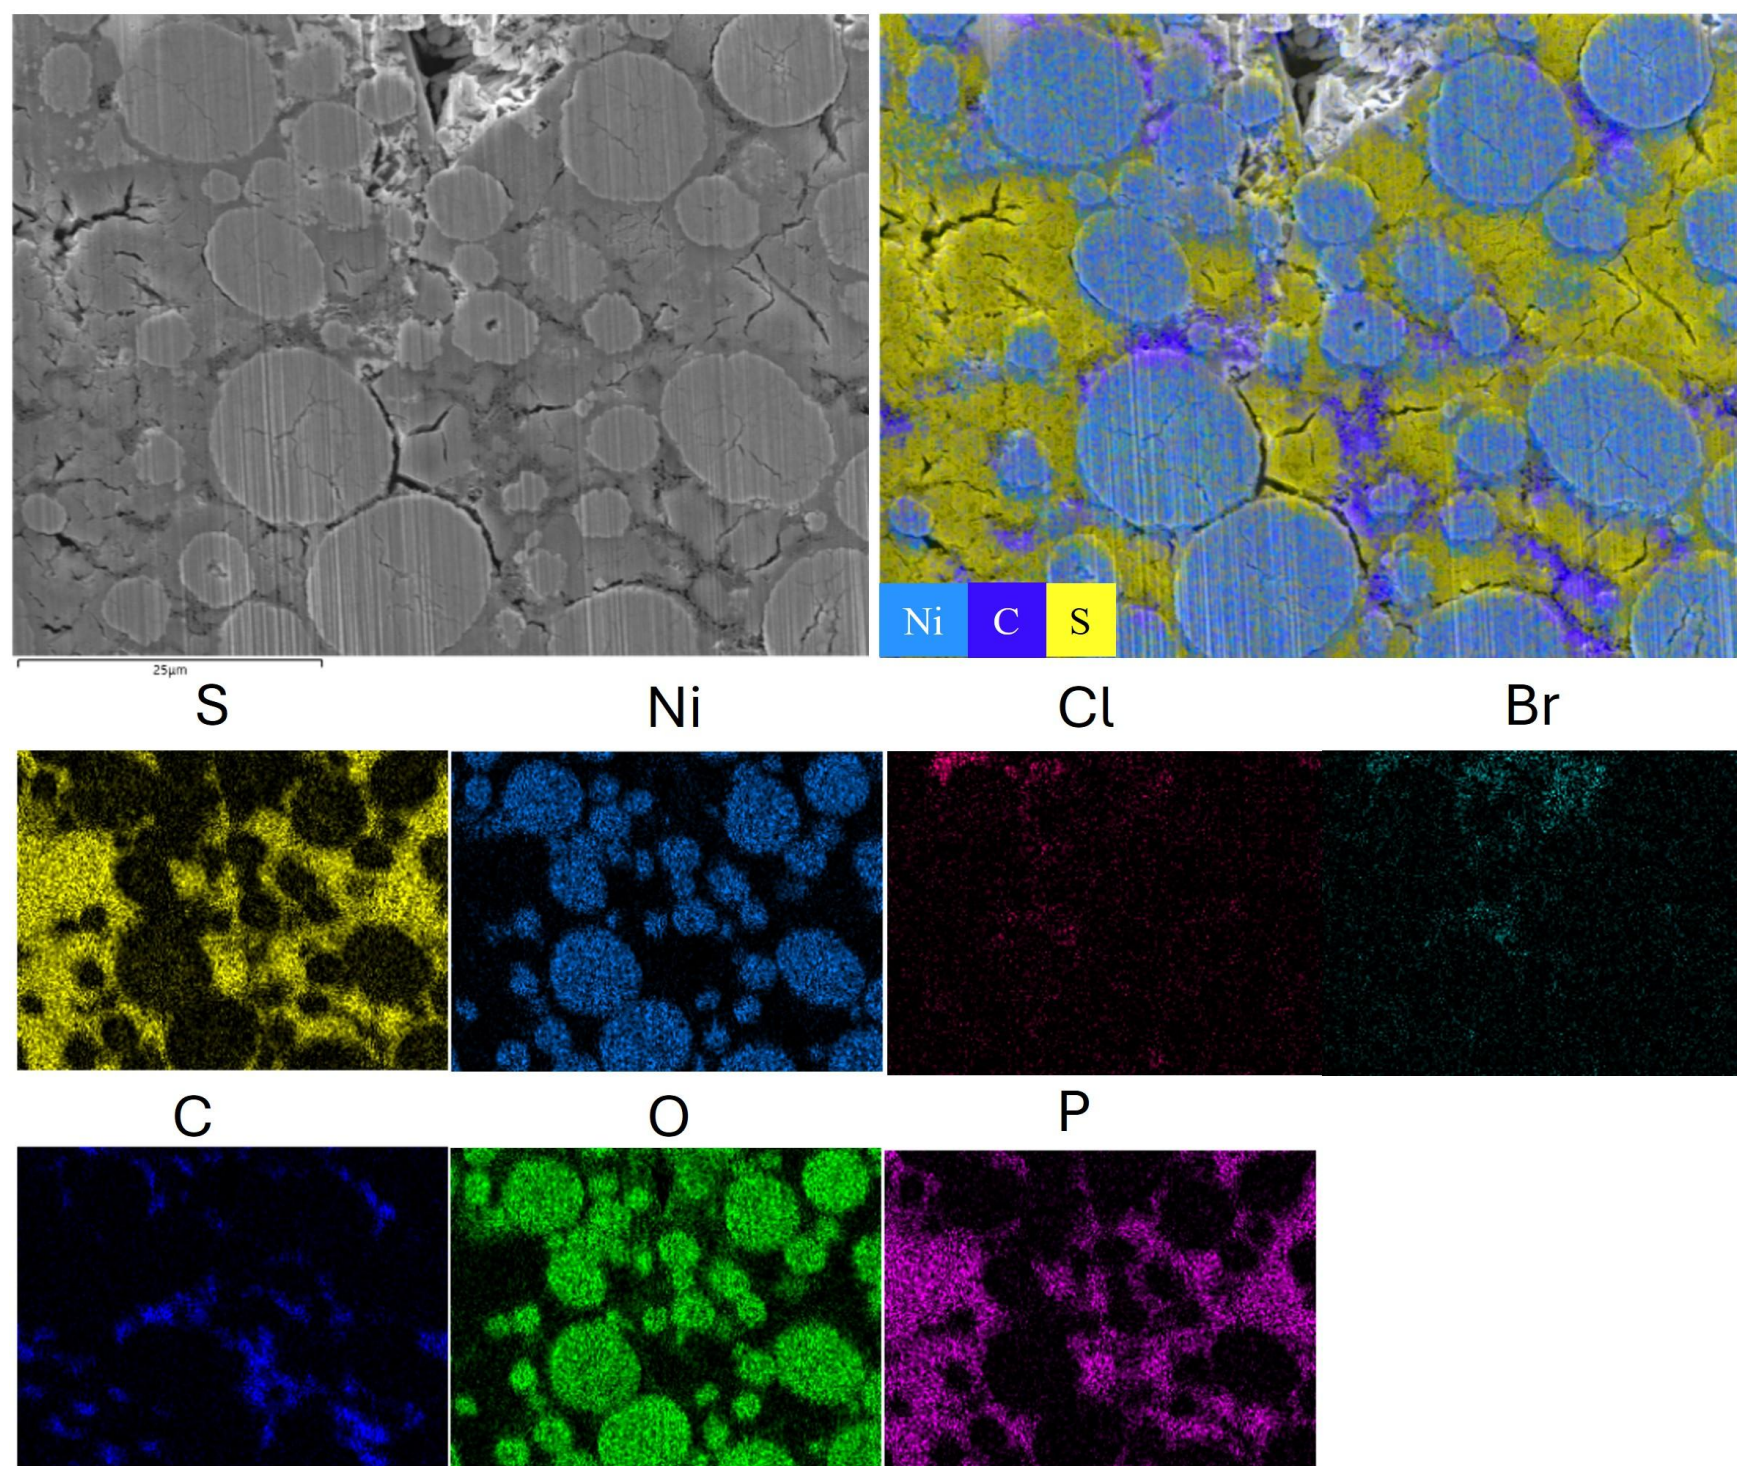

Figure S3. The cross-sectional SEM image and its SEM-EDS mapping results of NMC811-LPSClBr after 200 cycles

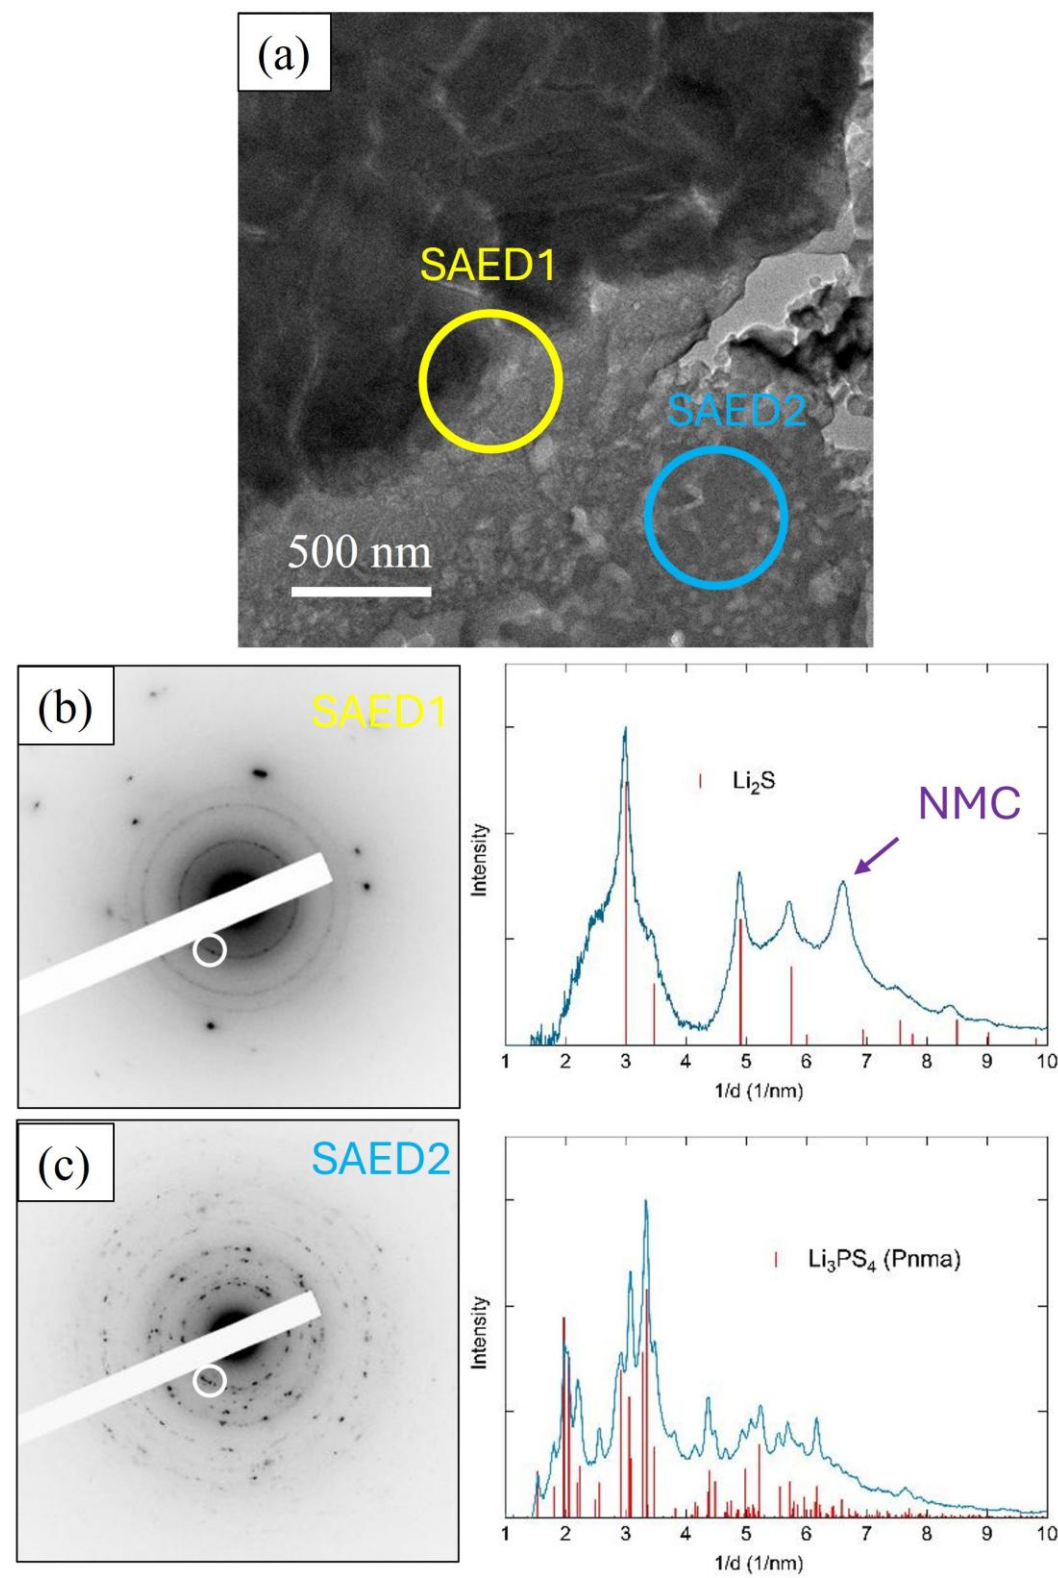

Figure S4. (a) the TEM image of NMC811-LPSClBr after 200 cycles (b) the SAED pattern and its intensity profile of the interface (c) the SAED pattern and its intensity profile of SE

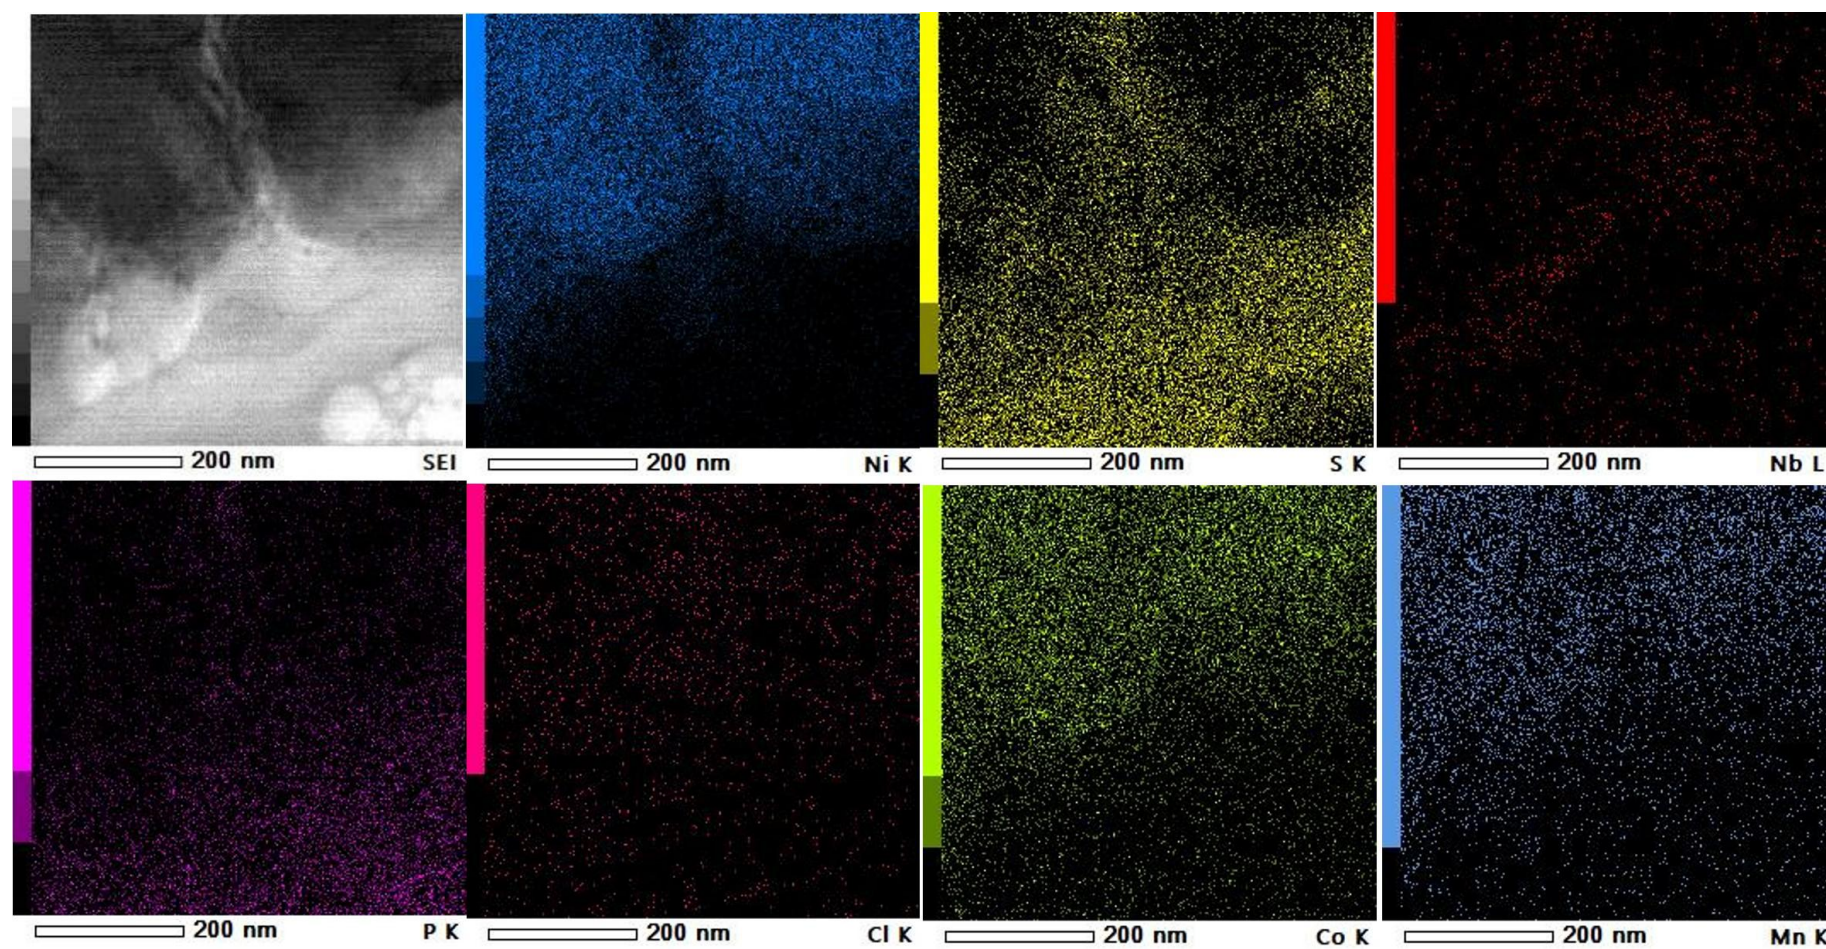

Figure S5. High magnification of STEM-EDS results at the interface between NMC811 and after 200 cycles
